# Supplementary material
Source: PubMed Central journal article supplement (PMC4640129)

## SUPPLEMENTARY DATA

Table S1. Average day of the year ( $\pm$  s.e.) of initiations and midpoint of phenological stages, and durations (in number of days) of phenophases reported for mid- and high elevation species and treatment combinations: A (low site/control), B (low site/dry), C (high site/control), D (high site/dry).

|                             | Treatment | Mid                  | High                 |                             | Treatment | Mid                  | High                 |
|-----------------------------|-----------|----------------------|----------------------|-----------------------------|-----------|----------------------|----------------------|
|                             |           | elevation<br>species | elevation<br>species |                             |           | elevation<br>species | elevation<br>species |
| Onset of<br>budding         | A         | 150.6 $\pm$ 2.2      | 145.1 $\pm$ 2.3      | Duration<br>of<br>budding   | A         | 27.1 $\pm$ 1.5       | 27.5 $\pm$ 1.3       |
|                             | B         | 148.5 $\pm$ 2.6      | 139.0 $\pm$ 1.9      |                             | B         | 23.8 $\pm$ 1.3       | 26.2 $\pm$ 1.2       |
|                             | C         | 183.1 $\pm$ 1.8      | 174.7 $\pm$ 1.3      |                             | C         | 26.6 $\pm$ 1.4       | 20.7 $\pm$ 1.0       |
|                             | D         | 182.9 $\pm$ 1.7      | 173.8 $\pm$ 1.0      |                             | D         | 22.8 $\pm$ 1.0       | 22.0 $\pm$ 1.0       |
| Onset of<br>flowering       | A         | 170.0 $\pm$ 2.5      | 165.2 $\pm$ 2.6      | Duration<br>of<br>flowering | A         | 17.8 $\pm$ 1.0       | 16.7 $\pm$ 0.9       |
|                             | B         | 167.4 $\pm$ 2.6      | 159.5 $\pm$ 2.3      |                             | B         | 16.4 $\pm$ 0.7       | 18.5 $\pm$ 1.1       |
|                             | C         | 200.6 $\pm$ 2.3      | 191.6 $\pm$ 1.9      |                             | C         | 19.0 $\pm$ 1.1       | 14.7 $\pm$ 0.7       |
|                             | D         | 199.1 $\pm$ 2.0      | 191.8 $\pm$ 1.8      |                             | D         | 17.6 $\pm$ 0.9       | 14.9 $\pm$ 0.6       |
| Onset of<br>fruiting        | A         | 176.5 $\pm$ 2.5      | 170.7 $\pm$ 2.7      | Duration<br>of fruiting     | A         | 42.7 $\pm$ 1.4       | 40.1 $\pm$ 1.4       |
|                             | B         | 173.4 $\pm$ 2.6      | 166.1 $\pm$ 2.4      |                             | B         | 39.5 $\pm$ 1.2       | 40.4 $\pm$ 1.3       |
|                             | C         | 207.7 $\pm$ 2.3      | 198.1 $\pm$ 1.9      |                             | C         | 52.5 $\pm$ 1.4       | 48.2 $\pm$ 1.3       |
|                             | D         | 205.2 $\pm$ 2.1      | 198.0 $\pm$ 1.7      |                             | D         | 46.1 $\pm$ 1.4       | 46.1 $\pm$ 1.3       |
| Midpoint<br>of<br>flowering | A         | 180.1 $\pm$ 2.4      | 174.7 $\pm$ 2.5      | Total<br>duration           | A         | 68.4 $\pm$ 1.5       | 65.7 $\pm$ 1.4       |
|                             | B         | 175.4 $\pm$ 2.4      | 169.0 $\pm$ 2.3      |                             | B         | 64.4 $\pm$ 1.4       | 67.6 $\pm$ 1.0       |
|                             | C         | 211.3 $\pm$ 2.5      | 198.4 $\pm$ 2.0      |                             | C         | 75.9 $\pm$ 1.9       | 71.2 $\pm$ 1.7       |
|                             | D         | 207.9 $\pm$ 2.1      | 197.9 $\pm$ 1.8      |                             | D         | 68.4 $\pm$ 1.6       | 70.1 $\pm$ 1.6       |

Fig. S1. Schematic overview of the experimental design.

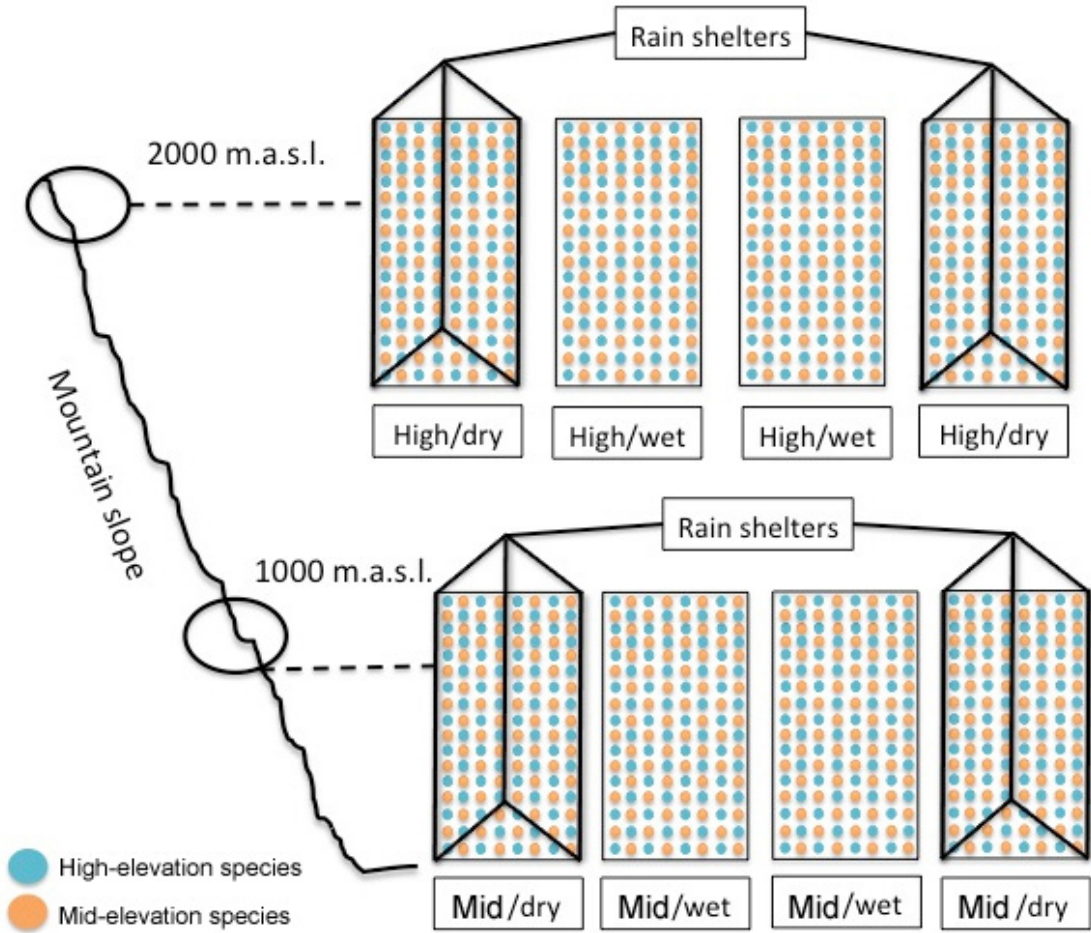

Supplement: supp_mcv155_aob-15117-s01.pdf [file supp_mcv155_aob-15117-s01.pdf]
